# Supplementary material for: Rewired m6A epitranscriptomic networks link mutant p53 to neoplastic transformation
Source: PubMed Central journal article supplement (PMC10042811; doi:10.1038/s41467-023-37398-9), 2023-03-27
Supplement: 41467_2023_37398_MOESM3_ESM.pdf [file 41467_2023_37398_MOESM3_ESM.pdf]

## **Description of Additional Supplementary Files**

File Name: Supplementary Data 1

Description: Peak annotation of p53 ChIP targets in WT and LFS astrocytes

File Name: Supplementary Data 2

Description: IP-MS identifies p53 and mutant p53 interacting proteins

File Name: Supplementary Data 3

Description: IP-MS identifies SVIL interacting proteins

File Name: Supplementary Data 4

Description: Peak annotation of m6A MeRIP targets in LFS astrocytes

File Name: Supplementary Data 5

Description: Peak annotation of YTHDF2 eCLIP targets in LFS astrocytes (Repcate #1 and #2)

File Name: Supplementary Data 6

Description: shRNA sequences and primers used for RT-qPCR, and ChIP-PCR
